# Supplementary material for: Investigating Evolutionary Rate Variation in Bacteria
Source: Springer Nature journal article supplement (doi:10.1007/s00239-019-09912-5), 2019-09-30
Supplement: 239_2019_9912_MOESM1_ESM.pdf [file 239_2019_9912_MOESM1_ESM.pdf]

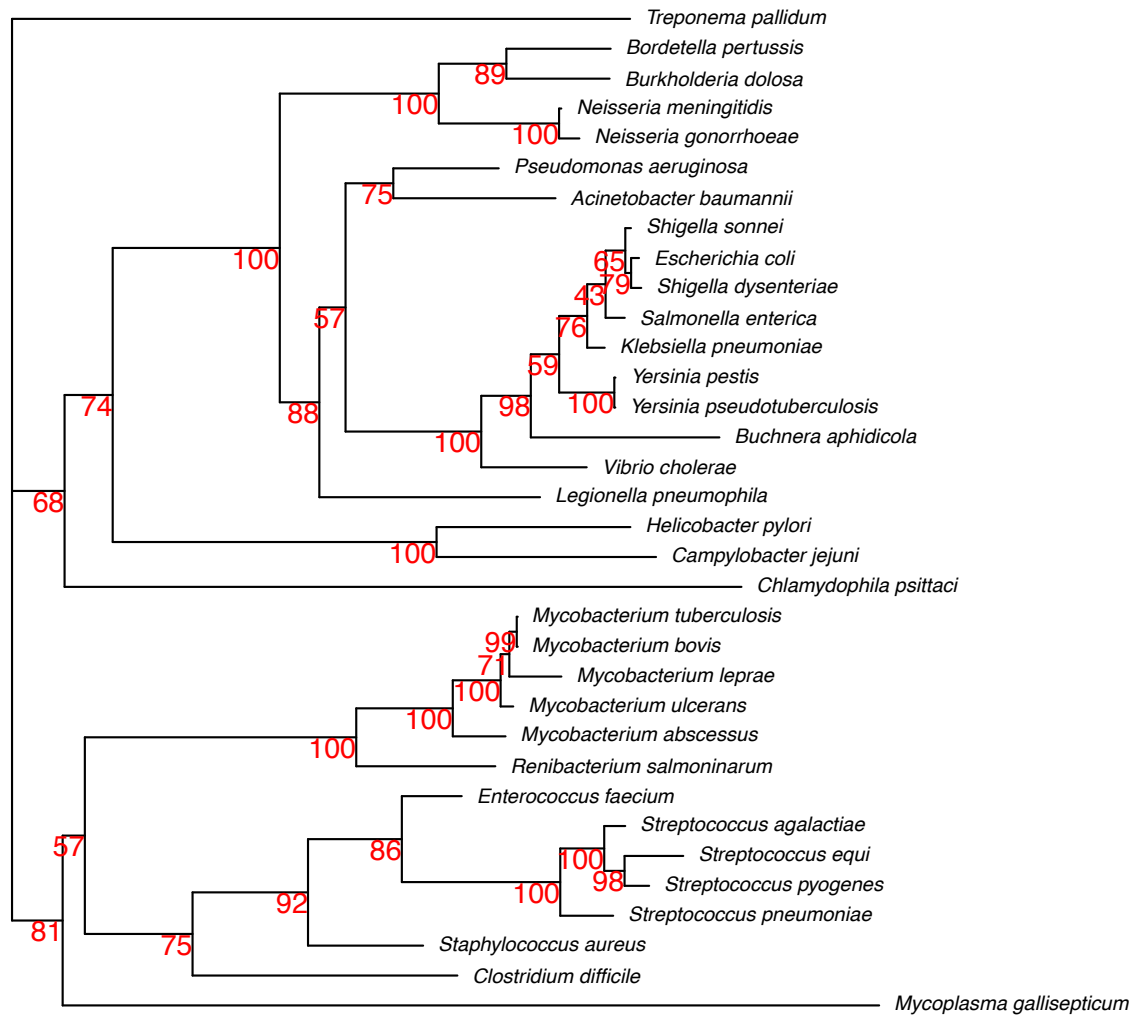

**Supplementary Figure 1.** 16s rRNA tree with bootstrap support values for the 34 species of bacteria for which we have an accumulation rate. This tree was used in phylogenetic analyses.
