# Supplementary material for: Investigating Evolutionary Rate Variation in Bacteria
Source: Springer Nature journal article supplement (doi:10.1007/s00239-019-09912-5), 2019-09-30
Supplement: 239_2019_9912_MOESM3_ESM.pdf [file 239_2019_9912_MOESM3_ESM.pdf]

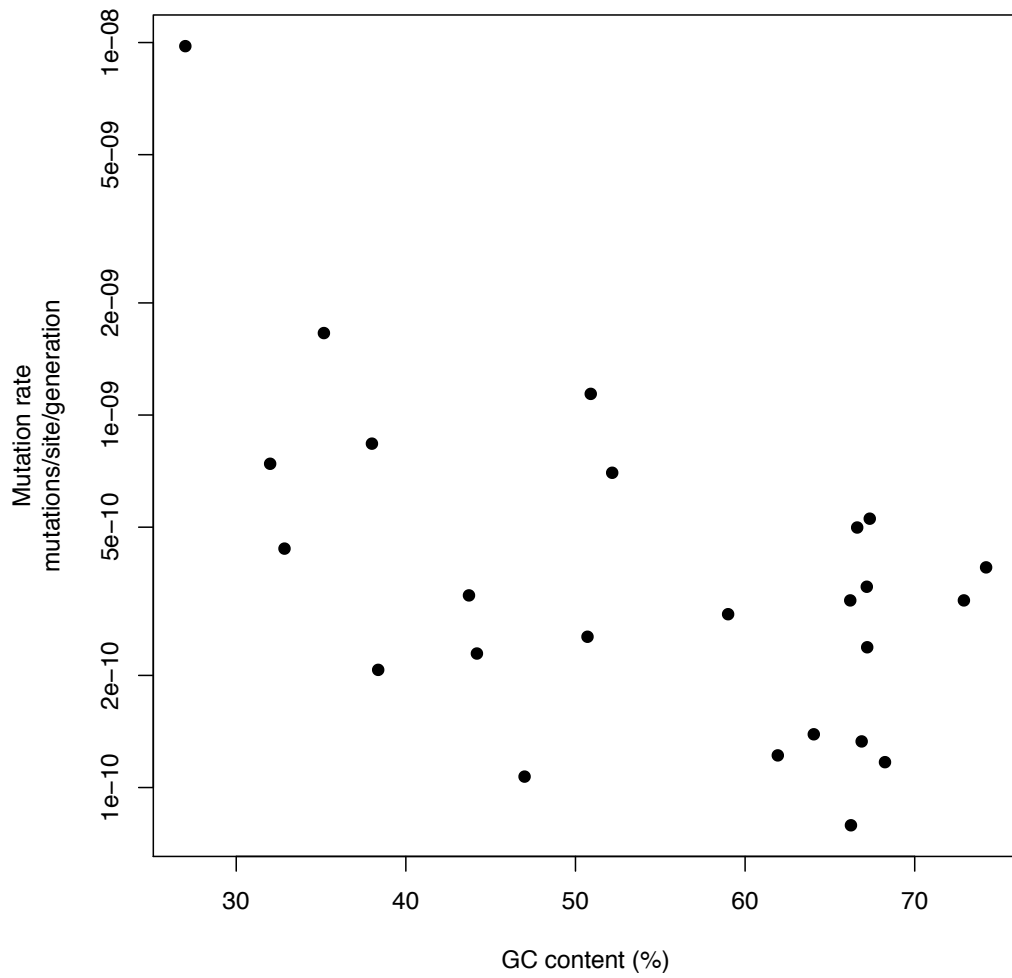

**Supplementary Fig. S3** The mutation rate/site/generation vs GC content for 26 species of bacteria.
